# Supplementary material for: Development and validation of a robust necroptosis related classifier for colon adenocarcinoma
Source: Front Genet. 2022 Aug 5;13:965799. doi: 10.3389/fgene.2022.965799 (PMC9389450; doi:10.3389/fgene.2022.965799)
Supplement: Supplementary file 1 [file Table1.XLS]

## Sheet: Sheet2
Table-S1:The necroptosis gene
BIRC2
BIRC3
CASP10
CASP8
CYLD
FADD
FAS
FASLG
LOX
MAPK8
MLKL
NOX1
OTUD7B
PGAM5
RFK
RIPK1
RIPK3
TICAM1
TLR3
TLR4
TNF
TNFAIP3
TNFRSF10A
TNFRSF10B
TNFRSF1A
TNFRSF1B
TNFSF10
TRADD
TRAF2
TRAF5
USP21
XIAP
ZBP1
