# Supplementary material for: Development and validation of a robust necroptosis related classifier for colon adenocarcinoma
Source: Front Genet. 2022 Aug 5;13:965799. doi: 10.3389/fgene.2022.965799 (PMC9389450; doi:10.3389/fgene.2022.965799)
Supplement: Supplementary file 2 [file Table2.XLS]

## Sheet: Sheet1
Table-S2: The Output of the Cox regression
gene	HR	coef	z	pvalue	lower	upper
TRAF2	1.36566	0.311641	2.63085	0.00851709	1.08271	1.72256
TRADD	1.23866	0.214033	1.99504	0.0460383	1.00377	1.52852
USP21	1.2381	0.213577	1.98108	0.0475823	1.00228	1.5294
FAS	0.825574	-0.191677	-1.89498	0.0580945	0.677107	1.00659
MLKL	1.18739	0.171759	1.64353	0.100273	0.967472	1.4573
TNFRSF10B	0.845813	-0.167457	-1.56713	0.117084	0.685992	1.04287
MAPK8	0.864618	-0.145468	-1.44856	0.147462	0.71014	1.0527
TRAF5	1.15545	0.144487	1.44526	0.148384	0.949846	1.40555
RIPK3	0.863772	-0.146447	-1.39747	0.162272	0.703393	1.06072
NOX1	0.875285	-0.133206	-1.39485	0.163062	0.725874	1.05545
TNFRSF10A	0.873789	-0.134917	-1.26696	0.205168	0.709191	1.07659
TLR4	0.896248	-0.109538	-1.0889	0.276199	0.73587	1.09158
TLR3	0.897074	-0.108617	-1.04008	0.298303	0.731032	1.10083
CASP8	0.90547	-0.0993007	-0.999737	0.317438	0.745293	1.10007
TICAM1	1.1012	0.0964045	0.90394	0.366027	0.893486	1.35721
BIRC2	0.928208	-0.0744993	-0.743305	0.457297	0.762662	1.12969
LOX	1.06248	0.0606078	0.601296	0.547643	0.872016	1.29455
OTUD7B	1.06372	0.0617687	0.599368	0.548928	0.869168	1.30181
PGAM5	0.94013	-0.0617367	-0.596986	0.550517	0.767648	1.15137
TNFSF10	0.942174	-0.0595654	-0.556517	0.577857	0.763879	1.16208
RIPK1	1.05555	0.0540597	0.528851	0.596909	0.863907	1.2897
TNF	0.946883	-0.05458	-0.505239	0.613391	0.766201	1.17017
TNFAIP3	0.951605	-0.0496058	-0.482159	0.629693	0.777826	1.16421
XIAP	1.04686	0.0457996	0.443345	0.657516	0.854983	1.28181
BIRC3	0.957123	-0.0438231	-0.419452	0.674885	0.779896	1.17462
CASP10	0.965773	-0.0348269	-0.334012	0.73837	0.787266	1.18475
ZBP1	0.967541	-0.0329973	-0.316114	0.751916	0.788528	1.18719
RFK	0.96797	-0.0325542	-0.310082	0.756499	0.787949	1.18912
TNFRSF1A	1.02338	0.0231118	0.228659	0.819134	0.839463	1.24759
TNFRSF1B	0.98575	-0.0143528	-0.14285	0.886408	0.809548	1.2003
FASLG	0.987644	-0.0124335	-0.117069	0.906805	0.802042	1.2162
FADD	1.00726	0.00723788	0.0715323	0.942974	0.826068	1.2282
CYLD	1.0049	0.00488486	0.0466783	0.96277	0.818547	1.23367
